# Supplementary material for: Optimizing antibiotic stewardship and reducing antimicrobial resistance in Central Asia: A study protocol for evidence-based practice and policy
Source: PLoS One. 2025 Jan 16;20(1):e0307784. doi: 10.1371/journal.pone.0307784 (PMC11737725; doi:10.1371/journal.pone.0307784)
Supplement: S1 Fig — (PDF) [file pone.0307784.s001.pdf]

School: NUSOM  
Project Investigator: PI: Yuliya Semenova, Co-PI: Lisa Lim, Co-PI: Larissa Makalkina

*Insert new rows ABOVE this one*
